# Supplementary material for: Sex specific role of RNA-binding protein, AUF1, on prolonged hypersensitivity after repetitive ischemia with reperfusion injury
Source: PubMed Central journal article supplement — bioRxiv. 2023 Jun 9:2023.06.08.544080. Preprint. [Version 1] doi: 10.1101/2023.06.08.544080 (PMC10274888; doi:10.1101/2023.06.08.544080), 2023-06-09
Supplement: media-1.pdf [file media-1.pdf]

# Supplementary Figure 1

## A AUF1 siRNA Knockdown

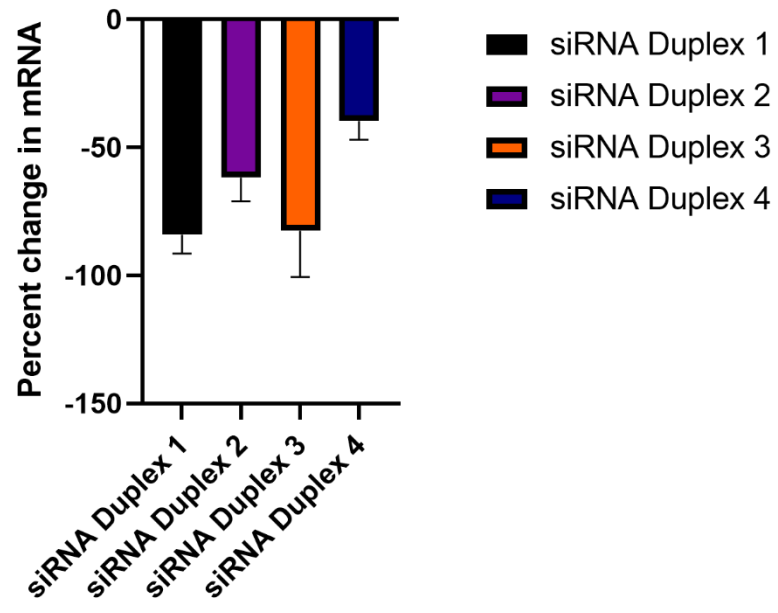

# Supplementary Figure 2

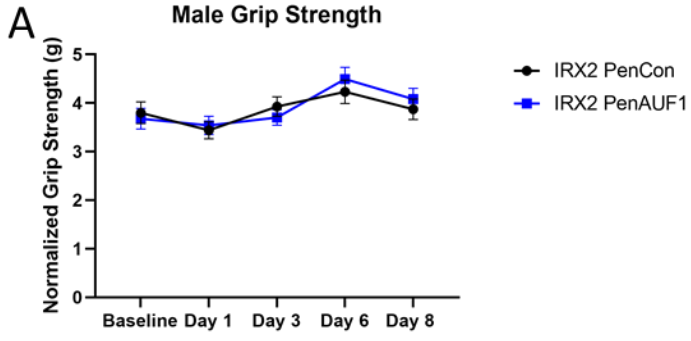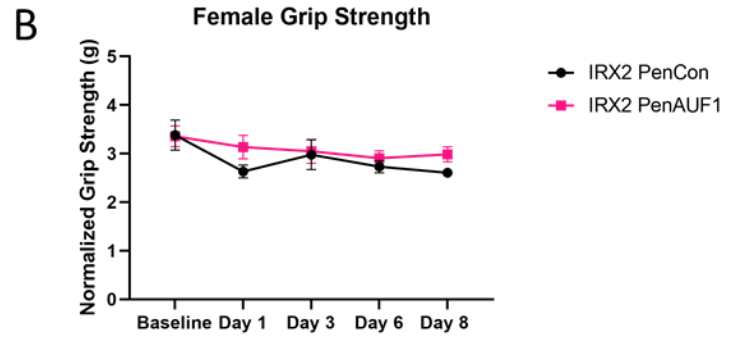

## Supplementary Table 1

| Gene           | Forward                  | Reverse                  |
|----------------|--------------------------|--------------------------|
| GAPDH          | ATGTGTCCGTCGTGGATCTGA    | ATGCCTGCTTCACCACCTTCTT   |
| GFR $\alpha$ 1 | GTGTGCAGATGCTGTGGACTAG   | TTCAGTGCTTCACACGCACTTG   |
| ASIC3          | CTCAACTATGAGGCCGTGGAACAA | TAAGCAGGCTGGCTCCGATAAACA |
| IL1r1          | AGGAATGTGGCTGAAGAGCACAGA | ACTCGTGTGACCGGATATTGCTTC |
| TRPV1          | TTCCTGCAGAAGAGCAAGAAGC   | CCCATTGTGCAGATTGAGCAT    |
| AUF1           | AGATCGACGCCAGTAAGA       | CAGCTAAGGCCTCCTATAAAC    |
